# Supplementary material for: Identification of spikes associated with local sources in continuous time series of atmospheric CO, CO 2 and CH 4
Source: Copernicus journal article supplement (doi:10.5194/amt-2017-247), 2017-09-21
Supplement: Supplementary file 1 [file amt-2017-247-supplement.pdf]

# Identification of spikes associated with local sources in continuous time series of atmospheric CO, CO<sub>2</sub> and CH<sub>4</sub>

Abdelhadi El Yazidi<sup>1</sup>. Michel Ramonet<sup>1</sup>. Philippe Ciais<sup>1</sup>. Gregoire Broquet<sup>1</sup>. Isabelle Pison<sup>1</sup>. Amara Abbaris<sup>1</sup>. Dominik Brunner<sup>2</sup>. Sebastien Conil<sup>3</sup>. Marc Delmotte<sup>1</sup>. Francois Gheusi<sup>4</sup>. Frederic Guerin<sup>5</sup>.  
5 Lynn Hazan<sup>1</sup>. Nesrine Kachroudi<sup>1</sup>. Giorgos Kouvarakis<sup>6</sup>. Nikolaos Mihalopoulos<sup>6</sup>. Leonard Rivier<sup>1</sup>.  
Dominique Serça<sup>5</sup>

<sup>1</sup>Laboratoire des sciences du climate et de l'environnement, LSCE/IPSL, CEA-CNRS-UVSQ, Université Paris-Saclay, 91191 Gif-sur-Yvette, France

10 <sup>2</sup>Laboratory for Air Pollution/Environmental Technology, Swiss Federal Laboratories For Materials Science and Technology, EMPA, Duebendorf, Switzerland

<sup>3</sup>Direction Recherche & Développement, Andra, CMHM, RD960, 55290 Bure France

<sup>4</sup>Laboratoire d'Aérodologie, Université de Toulouse, CNRS, UPS, UMR5560, 14 Av. Edouard Belin, 31400 Toulouse,

15 <sup>5</sup>Geosciences Environnement Toulouse UMR 5563 & UR 234 IRD, Université Paul-Sabatier, Avenue Edouard Belin 14, F-31400 Toulouse, France

<sup>6</sup>Environmental Chemical Processes Laboratory, Department of Chemistry, University of Crete, 71003, Heraklion, Greece

Correspondence to: A El Yazidi ([abdelhadi.el-yazidi@lsce.ipsl.fr](mailto:abdelhadi.el-yazidi@lsce.ipsl.fr))

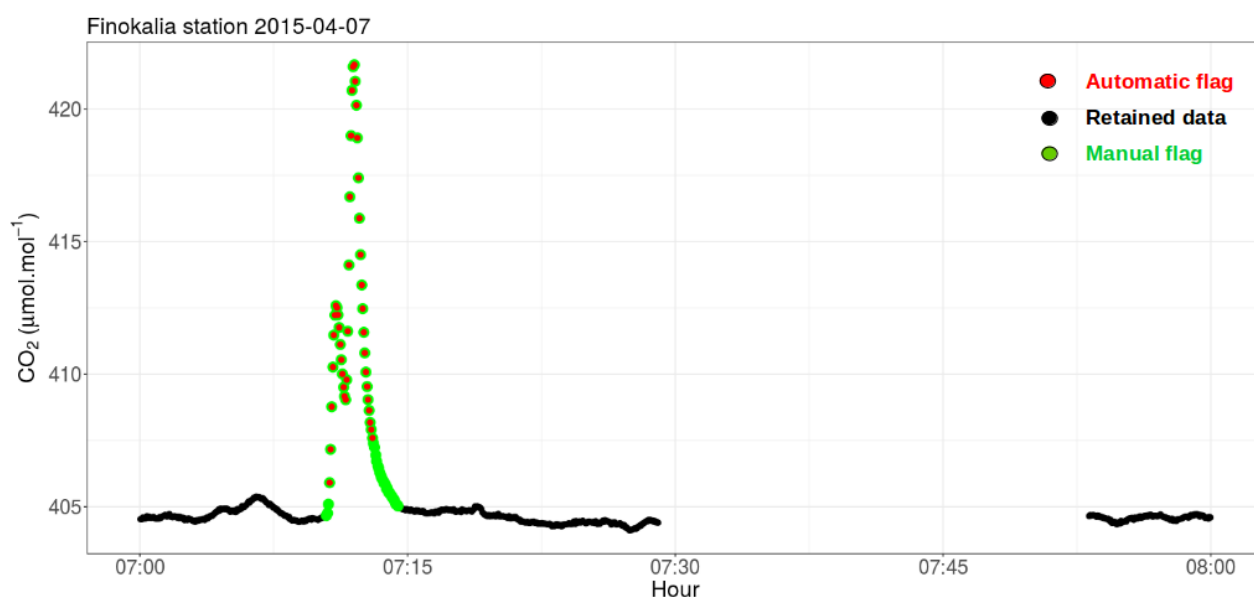

20 **Figure S1: Comparison between manual and automatic flagging (SD method), at Finokalia station. Green and red colors represent data flagged by manual and automatic flagging respectively, black color shows the retained data.**

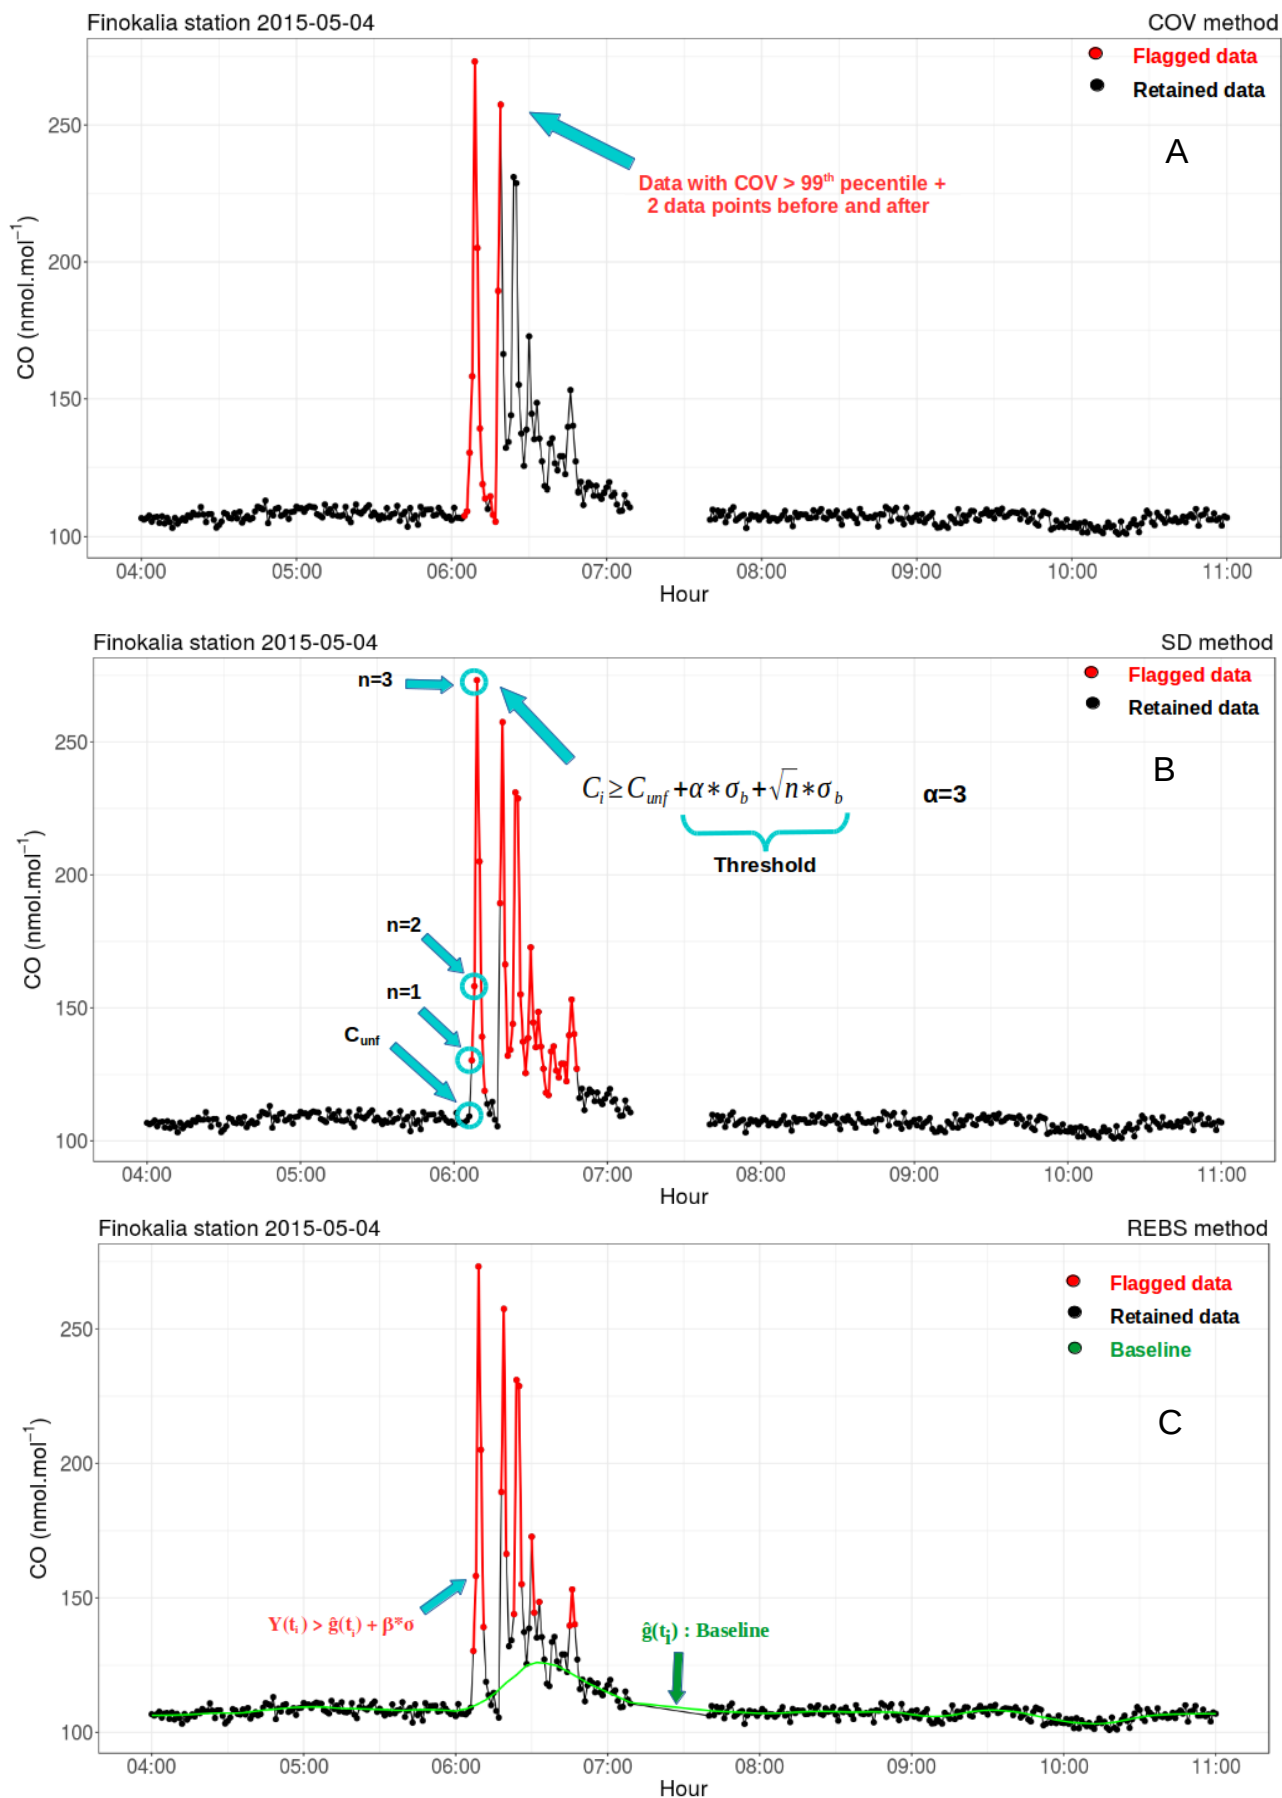

Figure S2: Example of a known contamination episode (between 6:00 a.m and 7:00 a.m) for CO measurements detected by COV method (A), SD method (B), and REBS method (C)

25

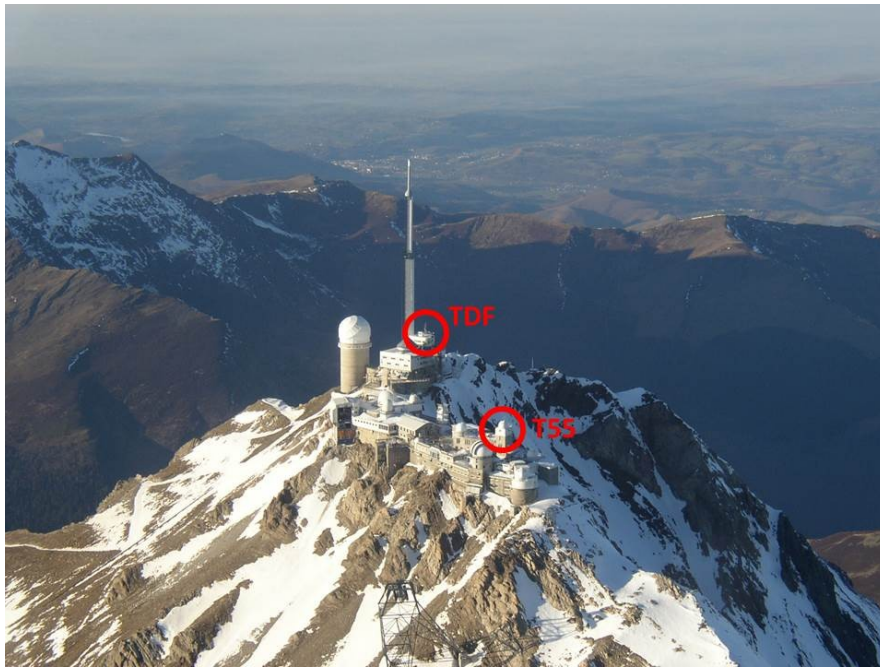

**Figure S3: Image of PDM station showing the location of AN-1 site (T55 building), and AN-2 (TDF building). 200 m separate the two buildings.**

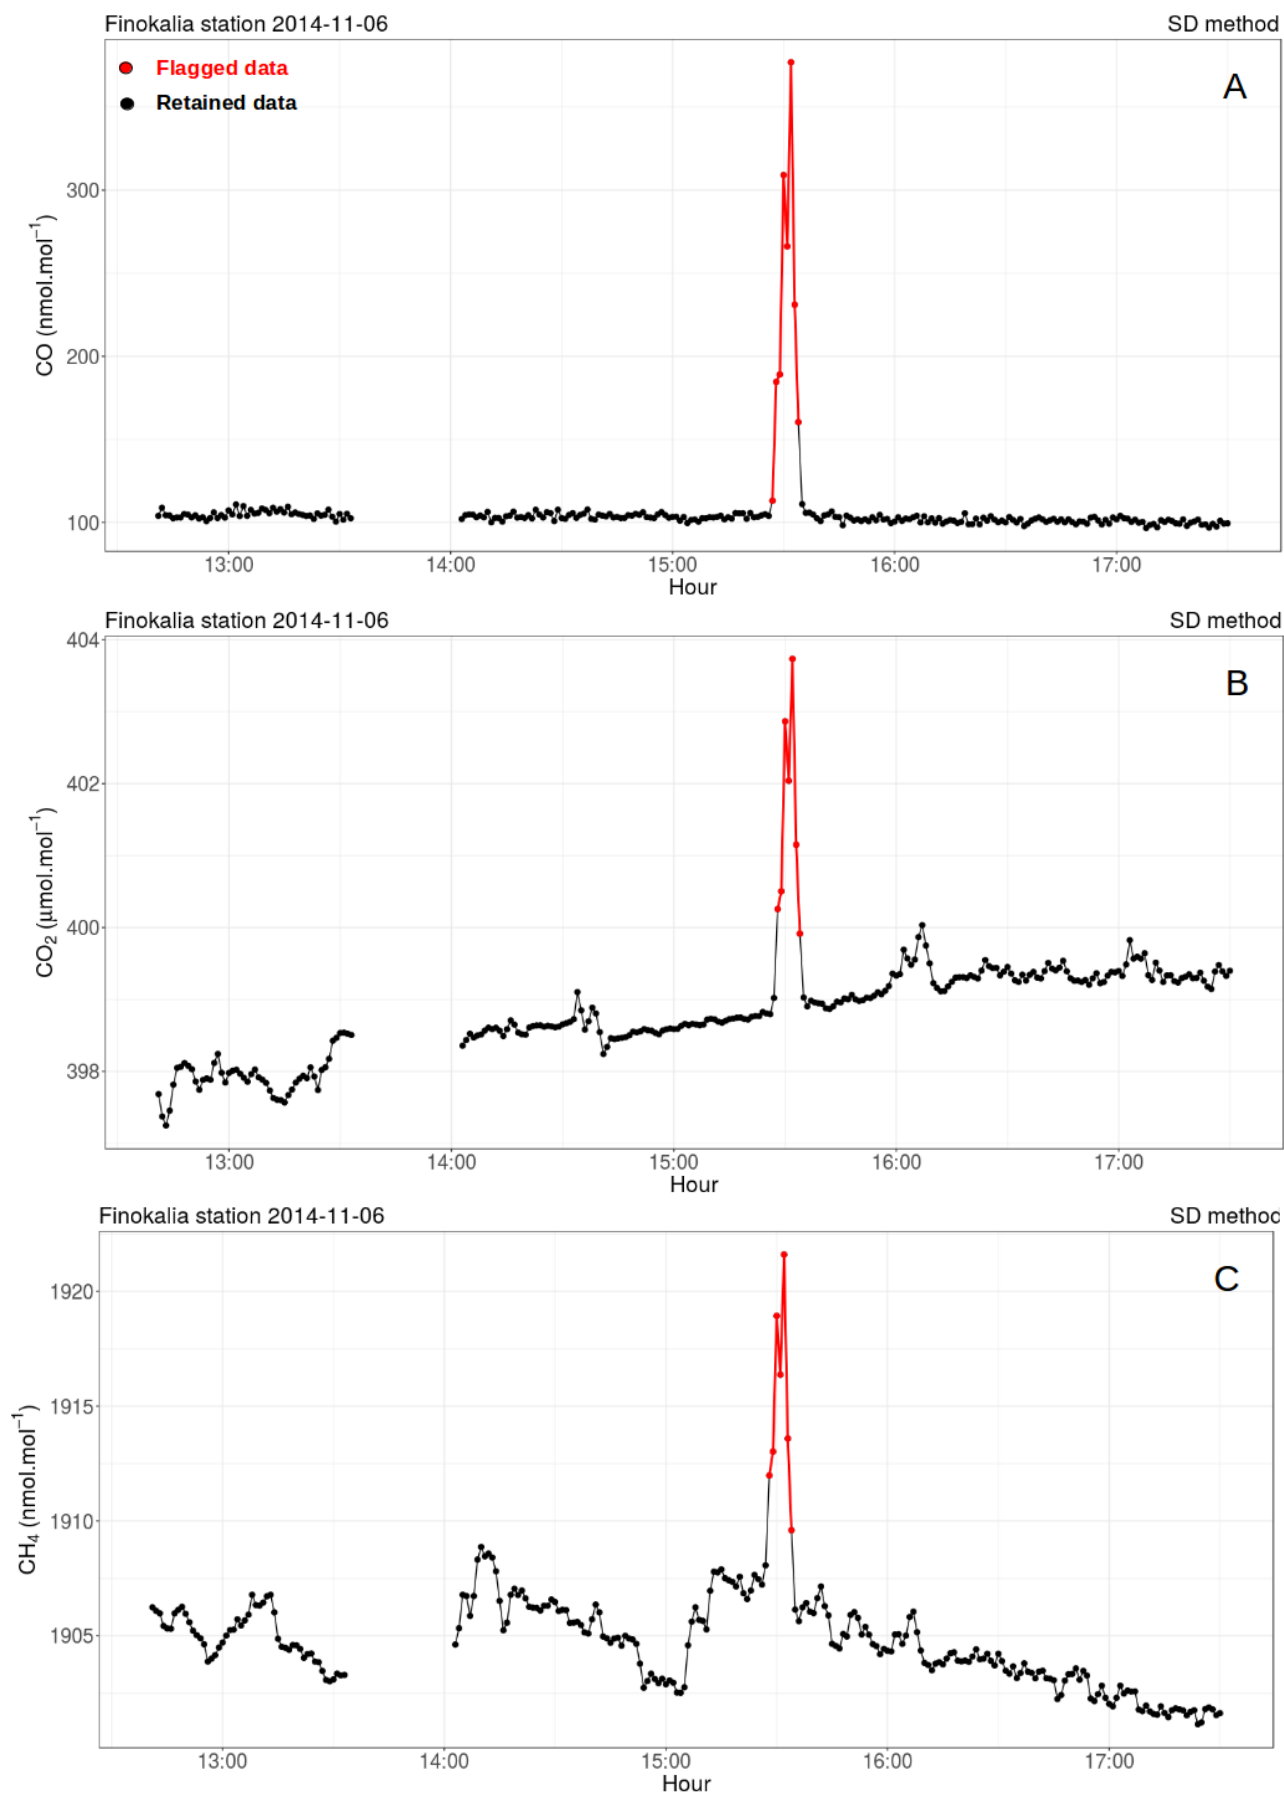

**Figure S4: CO, CO<sub>2</sub> and CH<sub>4</sub> (A, B, and C) measurements during a waste burning episode (red points) at Finokalia from 1 p.m. to 5:30 p.m. on the 6<sup>th</sup> of November 2014.**

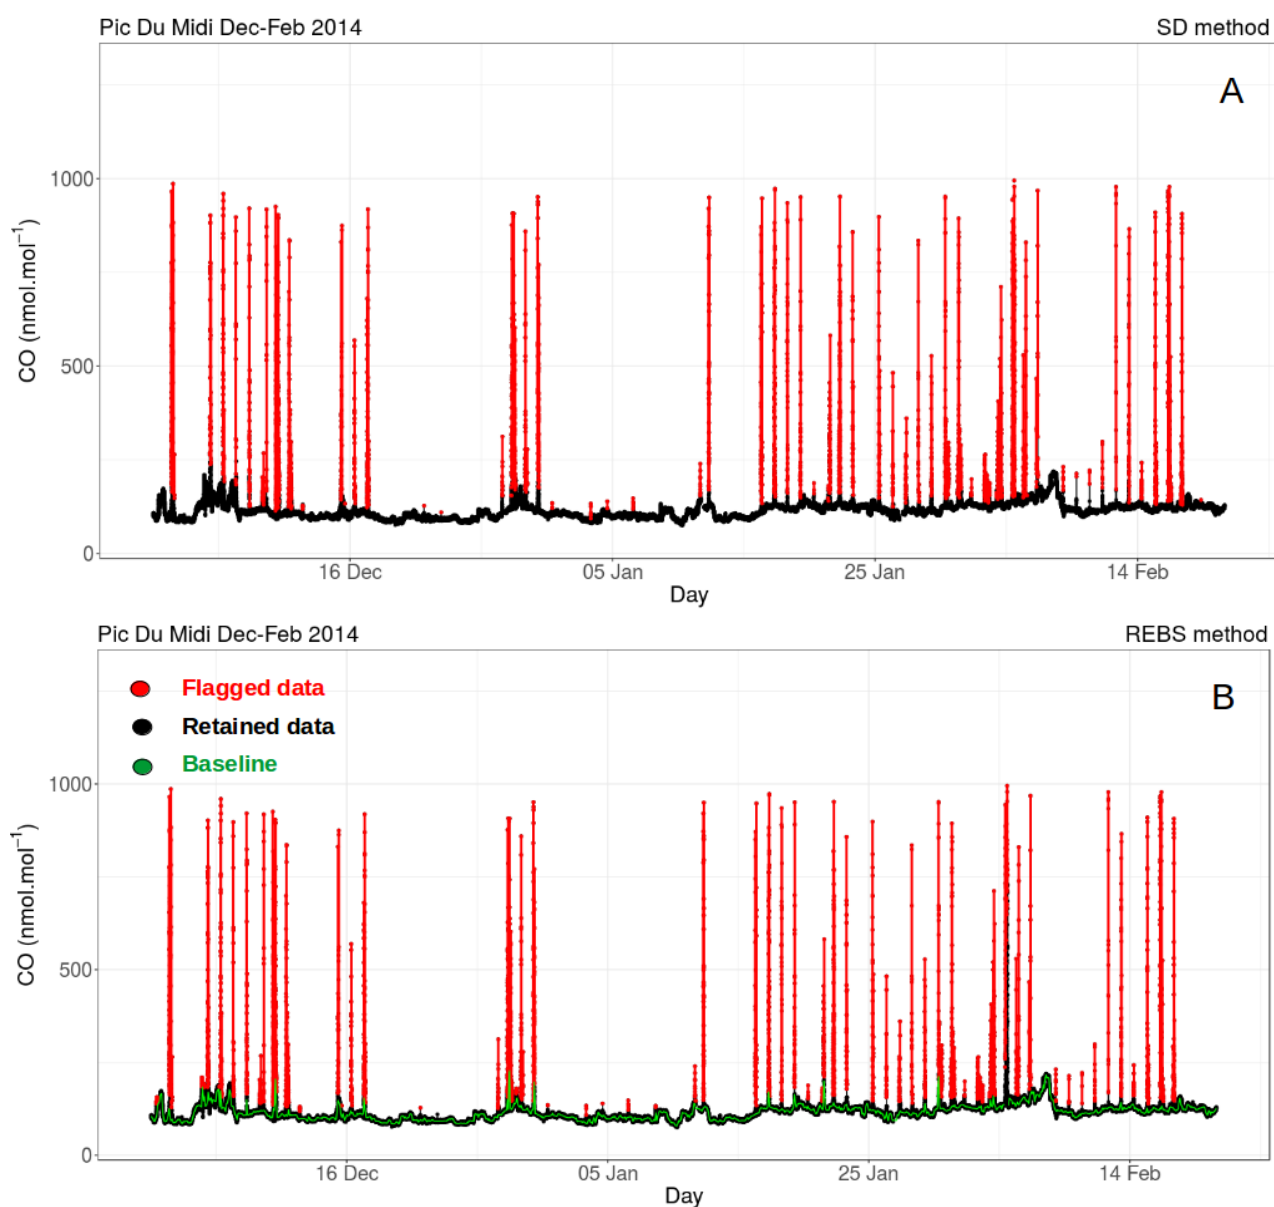

**Figure S5: CO measurements from December to February 2014 at Pic Du Midi. Black (red) data points are the retained (flagged) measurements detected by SD method (A), and REBS method (B). The contaminated data linked to the snow removal are characterized by very high CO concentrations up to 1000 nmol.mol<sup>-1</sup>.**

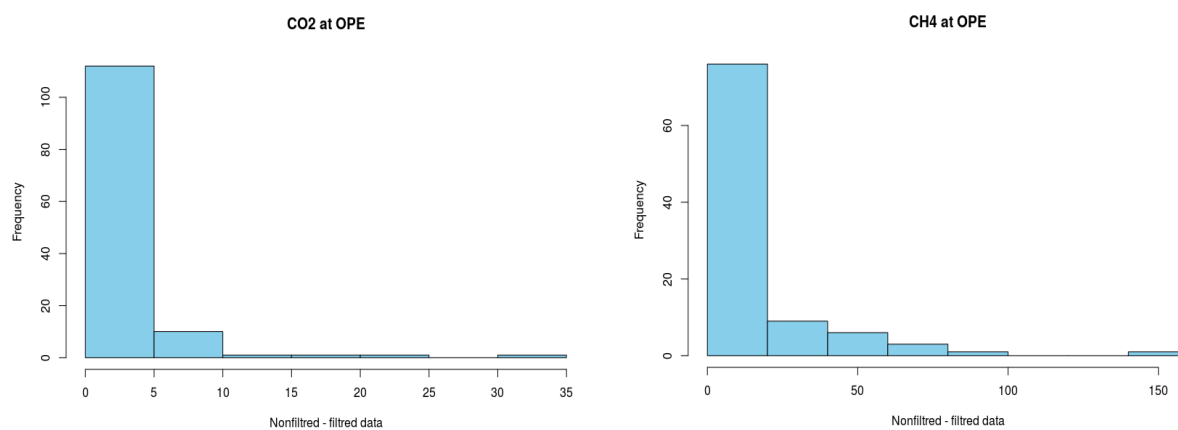

**Figure S6: Histograms of differences between filtered and the non-filtered time-series averaged at a hourly scale at OPE. The x axis represents the value of differences in ( $\mu\text{mol.mol}^{-1}$ ) for CO2 and ( $\text{nmol.mol}^{-1}$ ) for CH4. The y axis represents the number of impacted hours.**
